# Supplementary material for: Stimulus–response complexity influences task-set inhibition in task switching
Source: PeerJ. 2021 Mar 30;9:e10988. doi: 10.7717/peerj.10988 (PMC8018243; doi:10.7717/peerj.10988)
Supplement: Supplemental Information 2 [file peerj-09-10988-s002.xlsx]

## Sheet: Sheet1
code in the raw data file	respective factors
ExperimentName	S-R complexity
aba	task sequence
fanying	response key
List1	practice list
mubiao	target stimuli
renwu	task
soa	ITI
xiansuo	cue
